# Supplementary material for: Integrated multi-omics analyses reveal the TM4SF family genes with prognostic and therapeutic relevance in hepatocellular carcinoma
Source: publisher site journal article supplement (doi:10.18632/aging.205398), 2024-01-10
Supplement: Supplementary file [file aging-v16i1-205398-supplementary-material-SD1.pdf]

SUPPLEMENTARY FIGURES

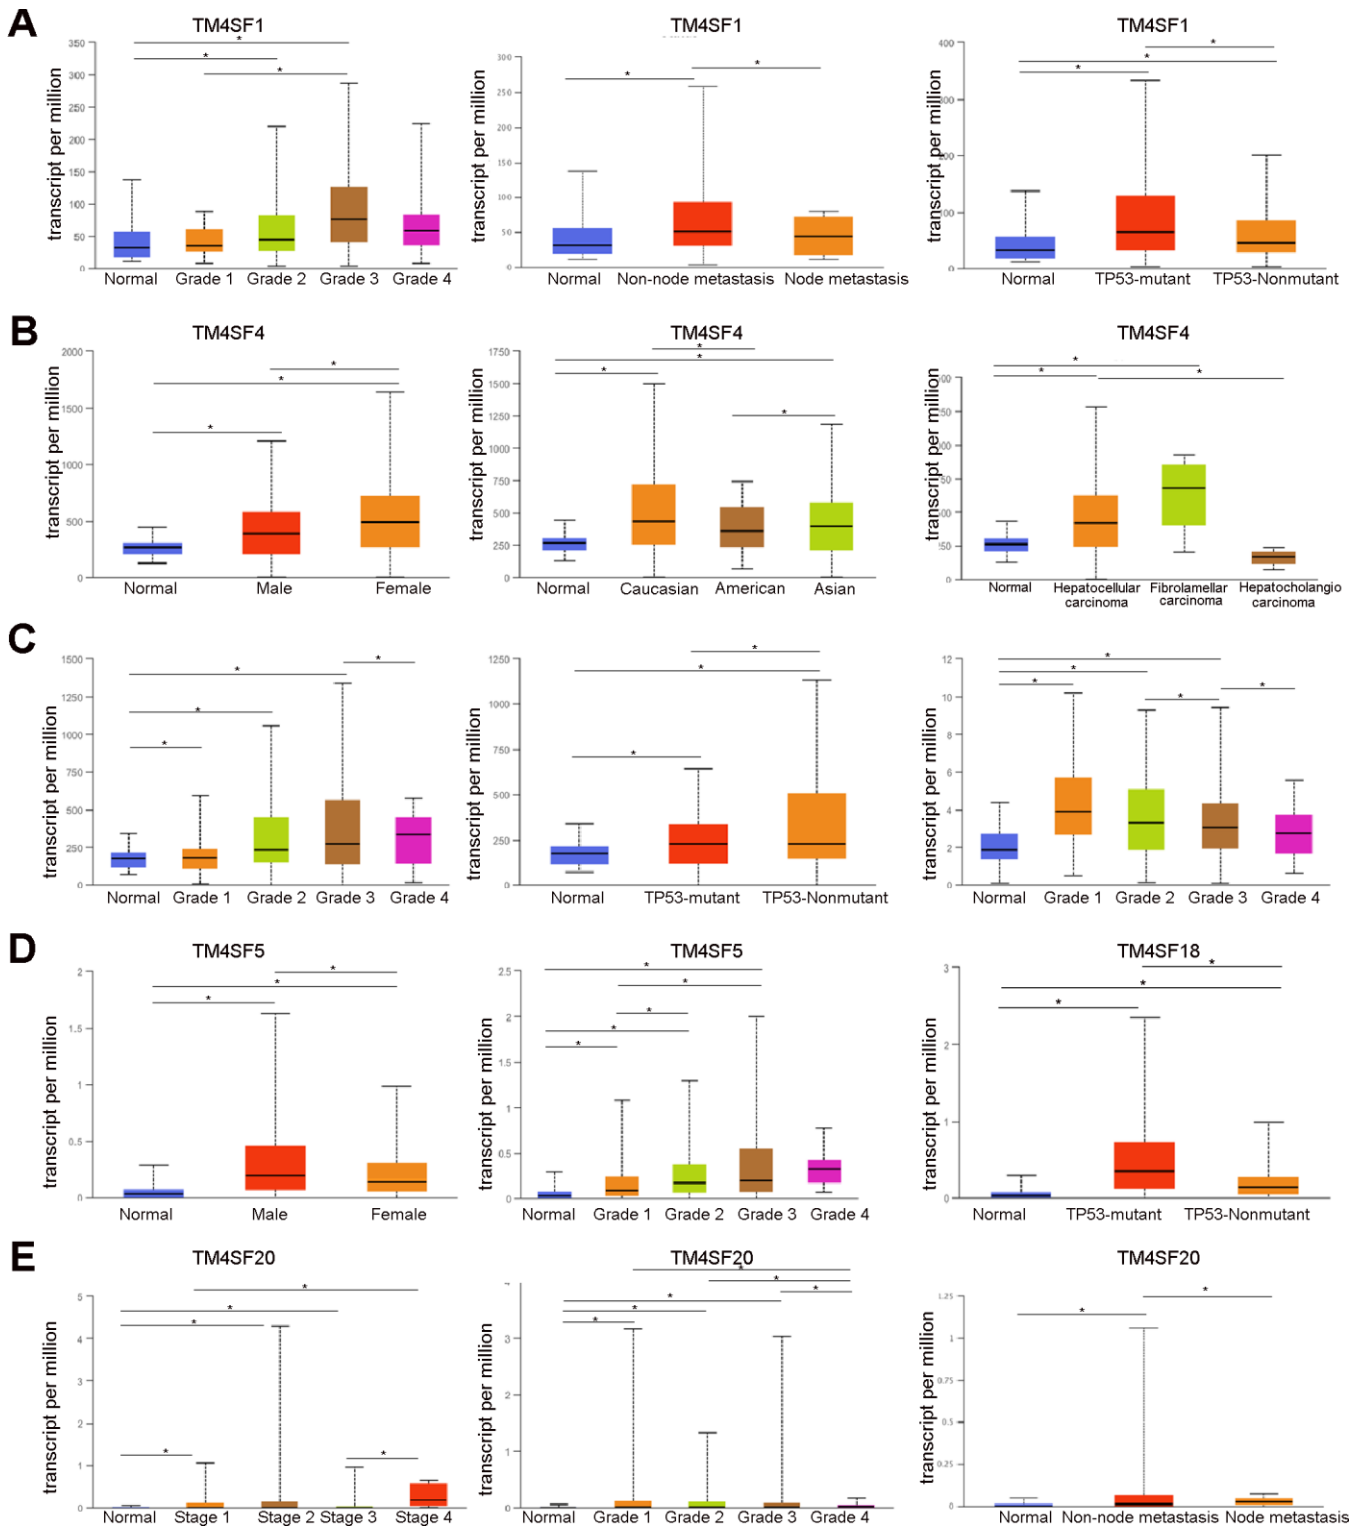

Supplementary Figure 1. Analysis of the relationship between TM4SFs expression and clinicopathologic parameters in LIHC (A–E).

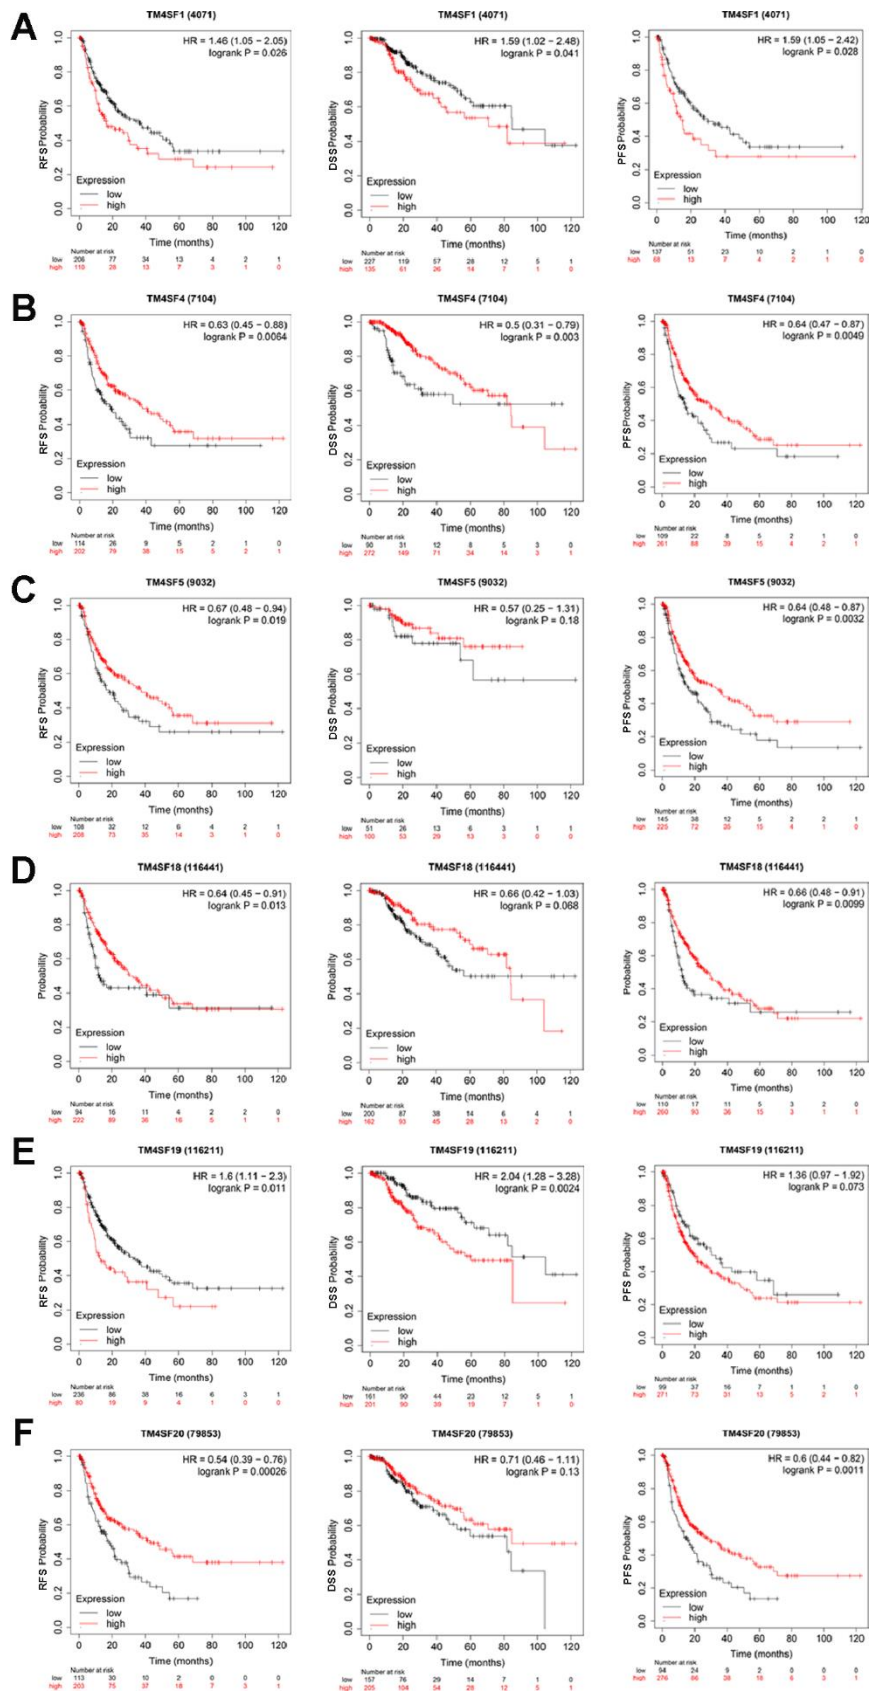

**Supplementary Figure 2. Kaplan–Meier survival curve analysis for TM4SF family members in LIHC. (A) TM4SF1, (B) TM4SF4, (C) TM4SF5, (D) TM4SF18, (E) TM4SF19, (F) TM4SF20.**

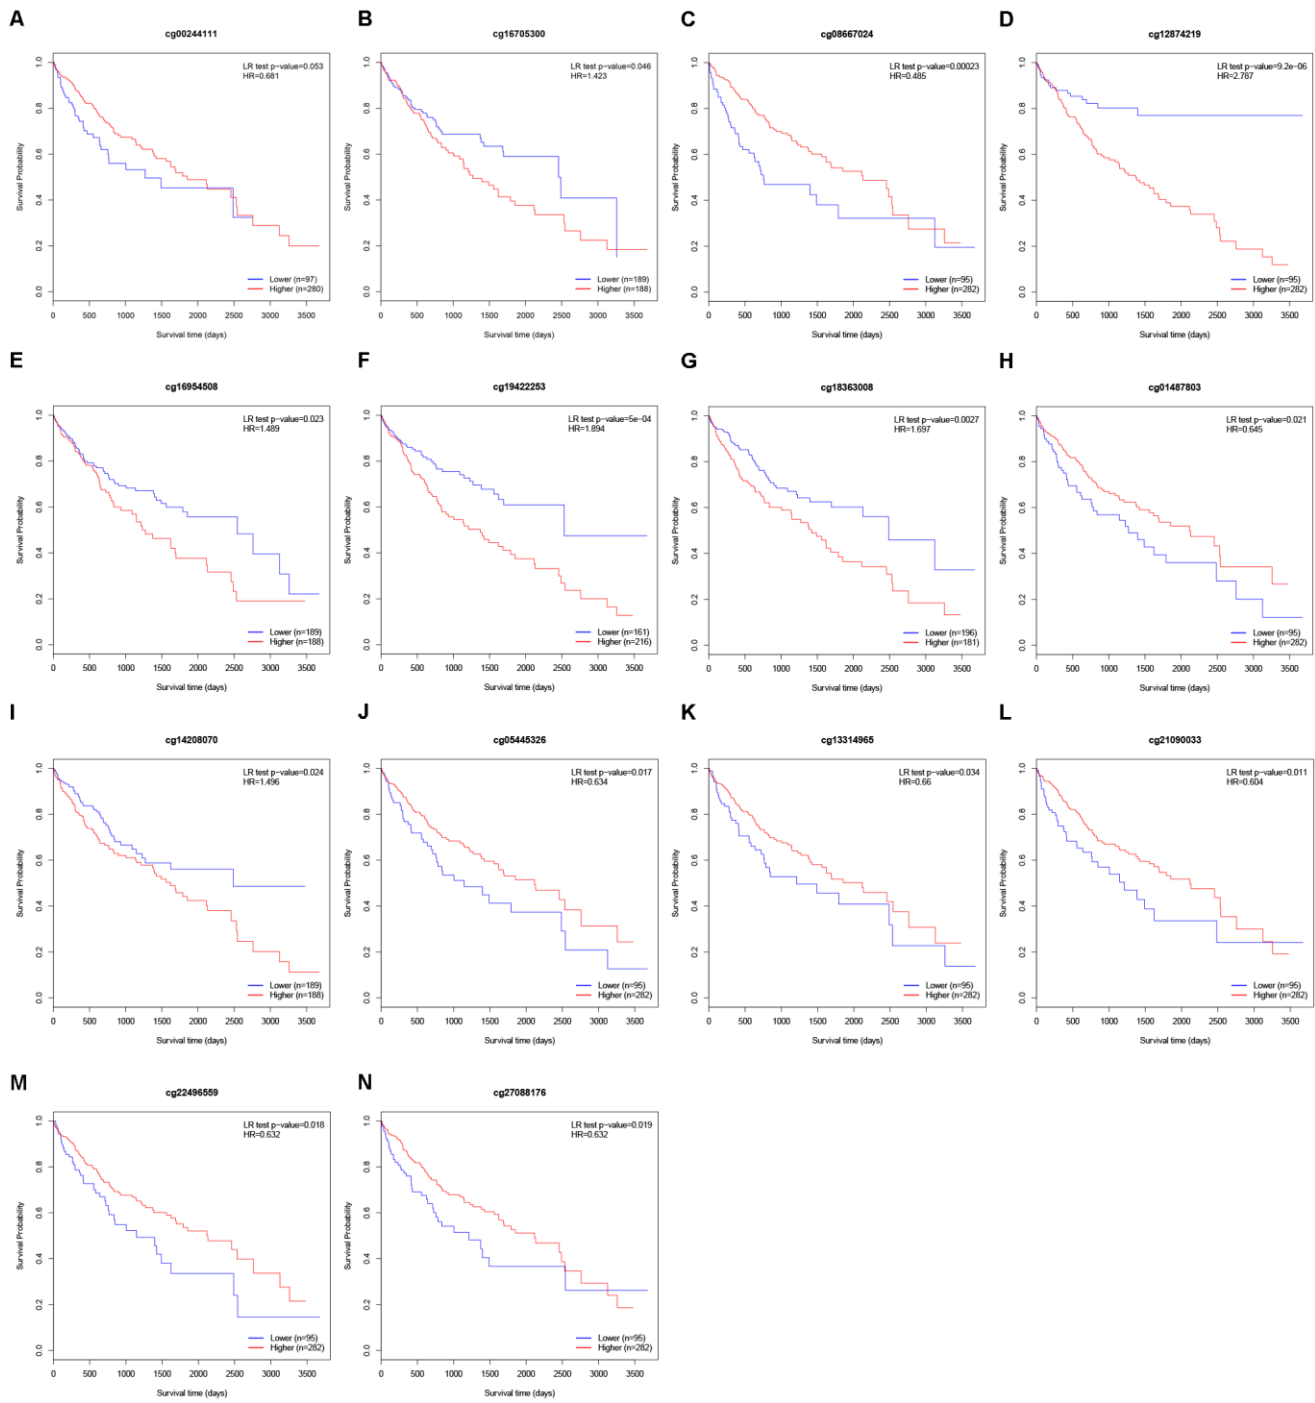

**Supplementary Figure 3.** Prognostic value of TM4SF-specific CpG site methylation in LIHC (A–N).
